# Supplementary material for: Efficient electrocatalytic reduction of carbon dioxide by metal-doped β12-borophene monolayers
Source: Royal Society of Chemistry journal article supplement (doi:10.1039/c9ra04135d), 2019-01-01
Supplement: c9ra04135d1.pdf [file c9ra04135d1.pdf]

# Efficient Electrocatalytic Reduction of Carbon Dioxide by Metal-doped $\beta_{12}$ -Borophene Monolayers

## *Supplemental Information*

Jin-Hang Liu,<sup>1</sup> Li-Ming Yang\*,<sup>1</sup> and Eric Ganz<sup>2</sup>

<sup>1</sup>Hubei Key Laboratory of Bioinorganic Chemistry and Materia Medica; Key Laboratory of Material Chemistry for Energy Conversion and Storage, Ministry of Education; Hubei Key Laboratory of Materials Chemistry and Service Failure; School of Chemistry and Chemical Engineering, Huazhong University of Science and Technology, Wuhan 430074, China. <sup>2</sup>School of Physics and Astronomy, University of Minnesota, 116 Church St. SE, Minneapolis, Minnesota 55455, USA. (email: Lmyang.uio@gmail.com, Lmyang@hust.edu.cn)

**Fig. S1.** The PDOS of the first transition metal series TM-B $_{\beta 12}$  monolayers. The dotted line denotes the Fermi level, the red, blue lines represent the 3d orbital of the metal atoms and the 2p orbital of the boron atom which nearest to the metal atoms, respectively.

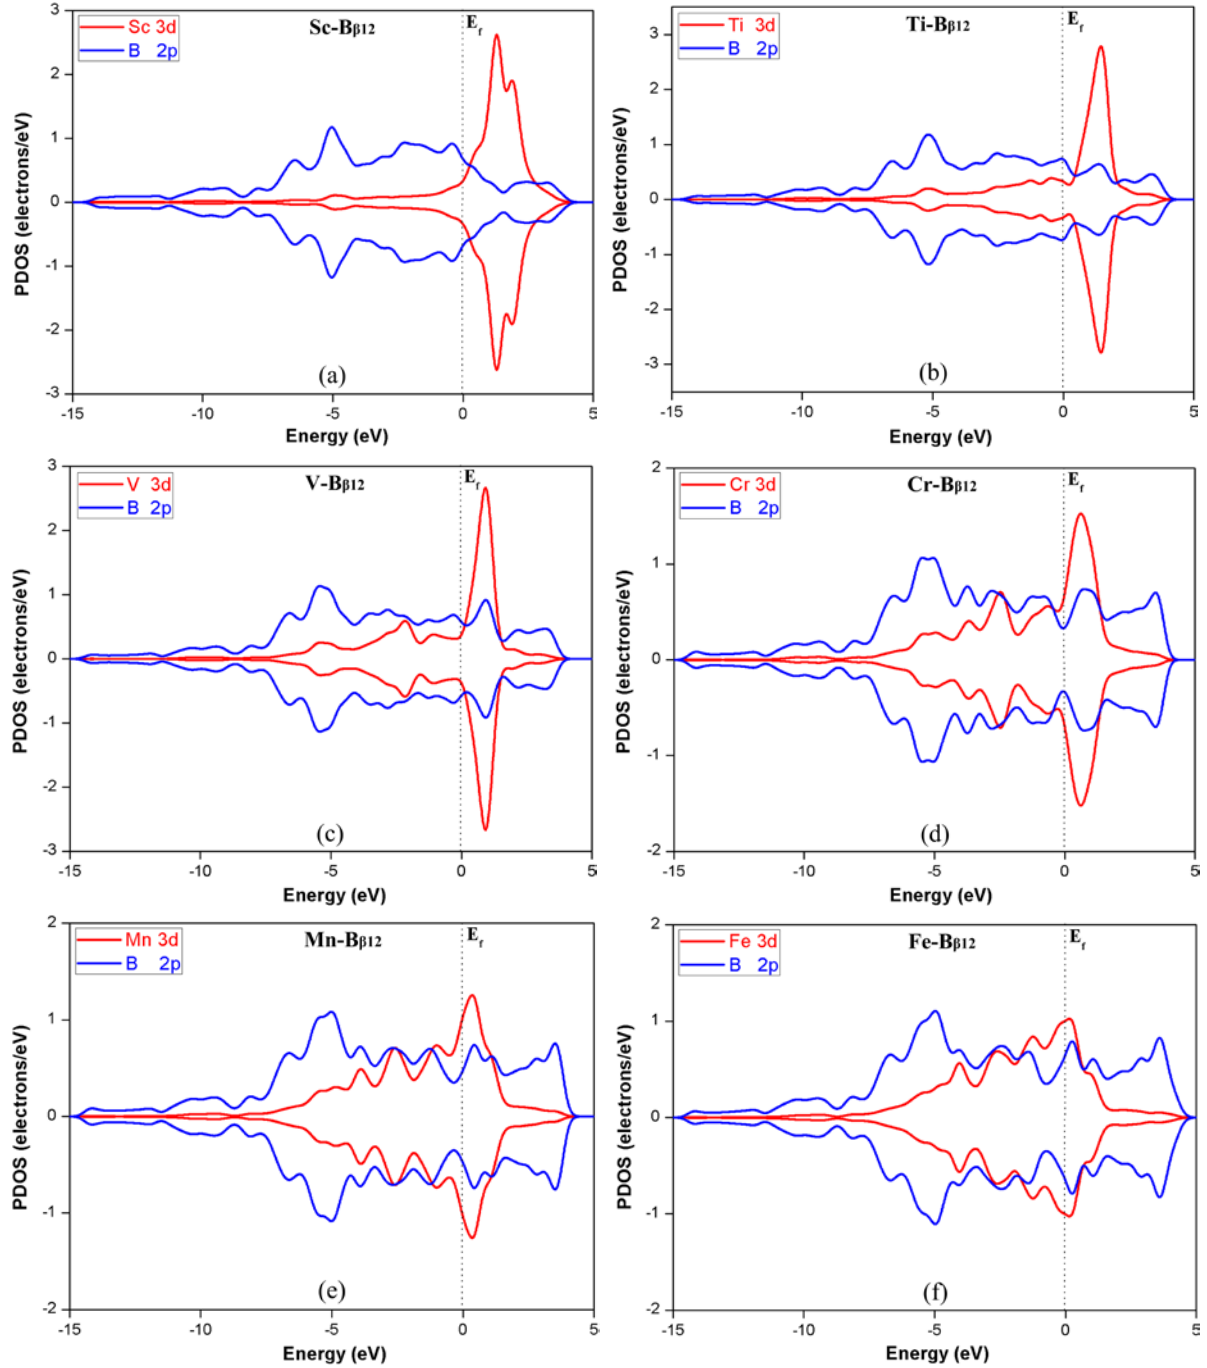

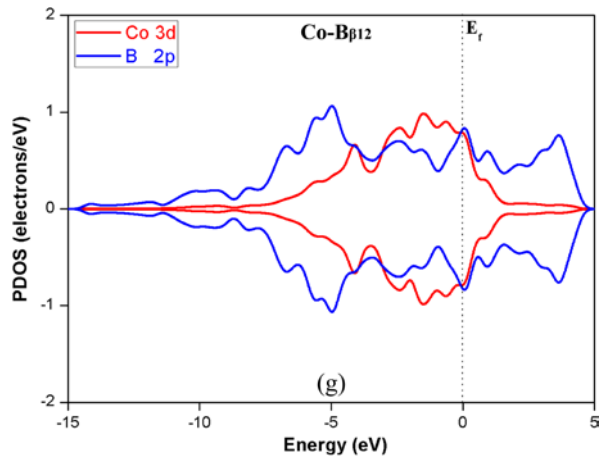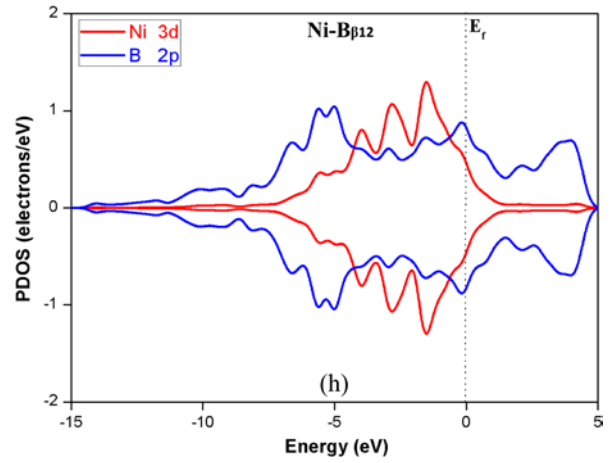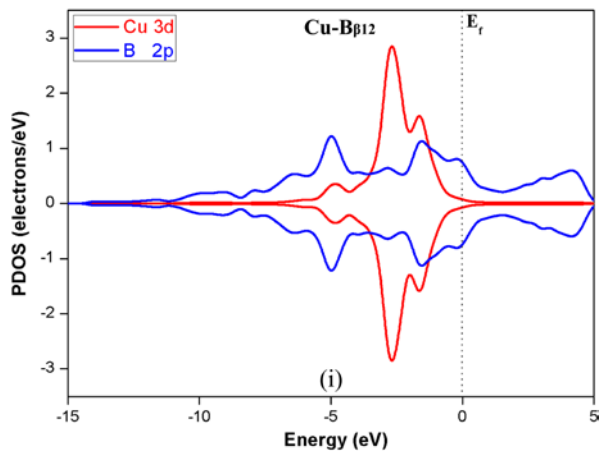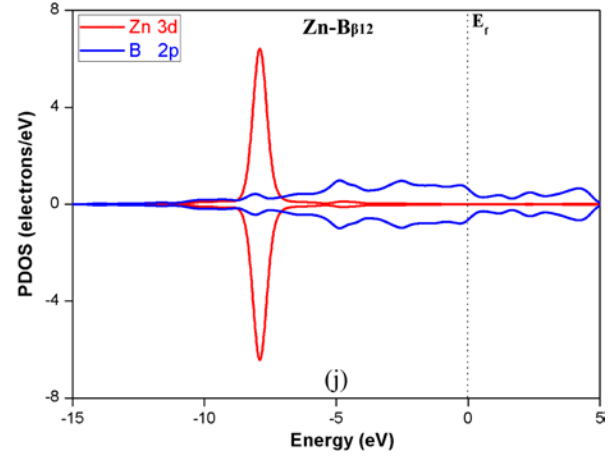

**Fig. S2** The structures and binding energies of Fe atoms with  $B_{\beta 12}$  monolayer: (a)  $Fe_3$  cluster, (b)  $Fe_4$  cluster, (c) 3 Fe single atoms and (d) 4 Fe single atoms.

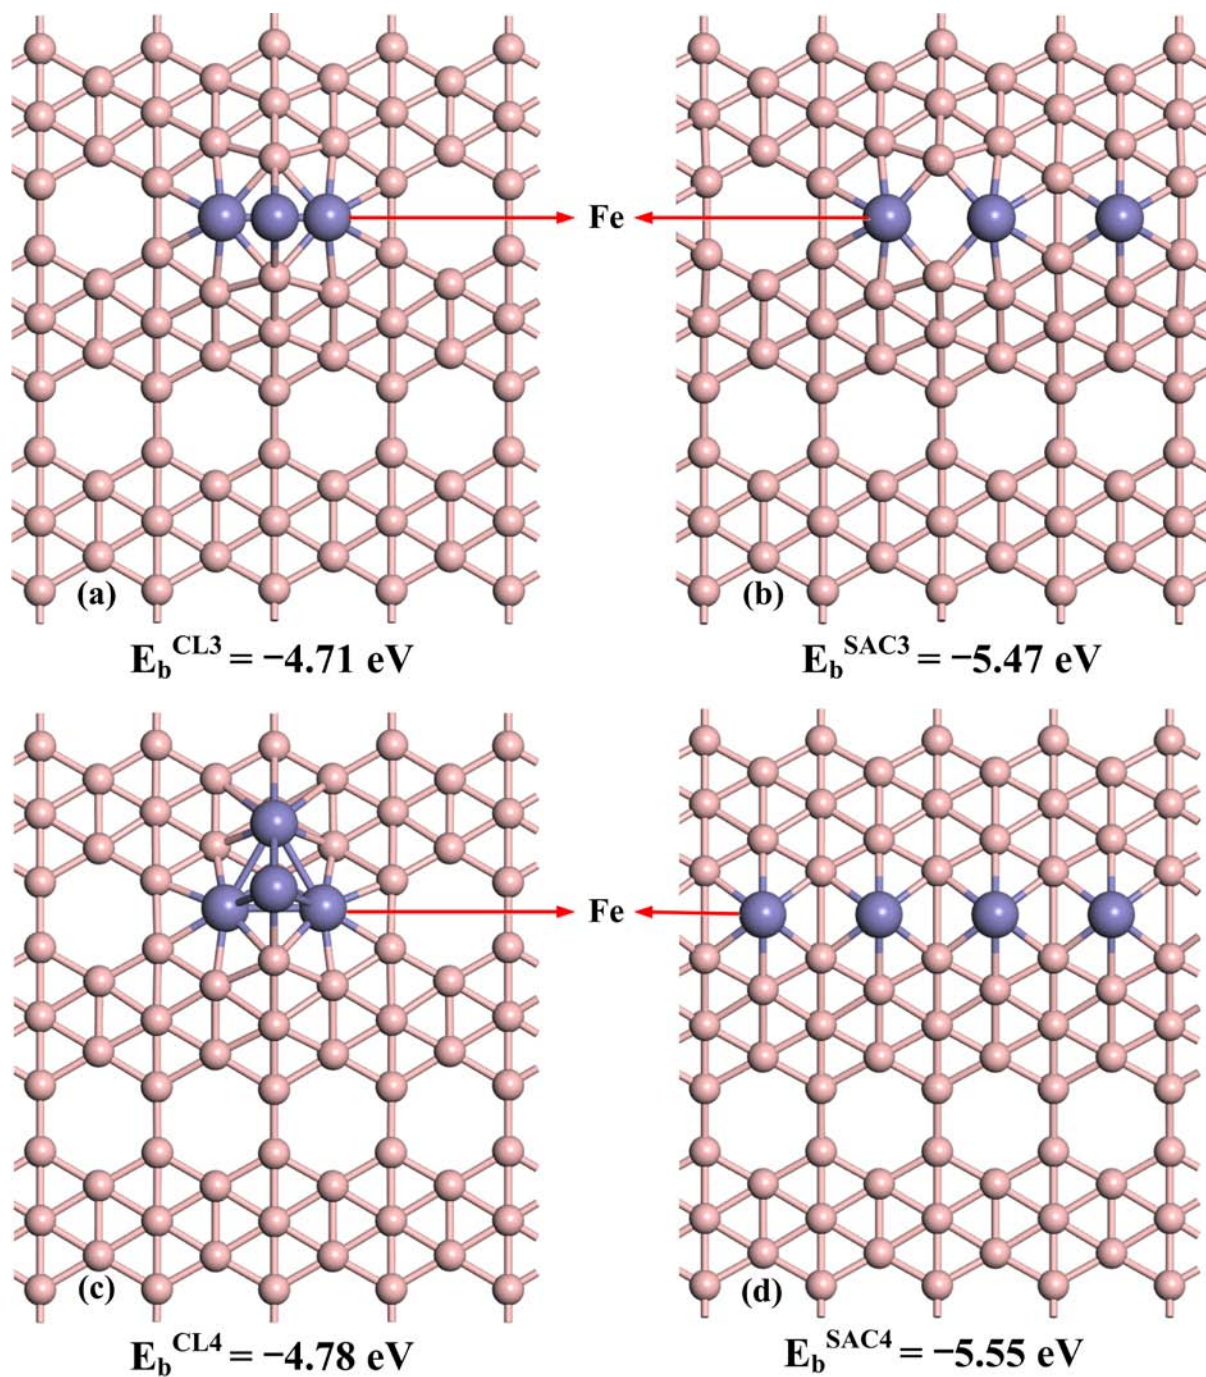

**Table S1.**  $E_b^{SAC1}$ ,  $E_b^{SAC3}$  and  $E_b^{SAC4}$  are the binding energies of single, three and four metal atoms with  $B_{\beta12}$  monolayer, respectively.  $E_b^{CL3}$  and  $E_b^{CL4}$  are the binding energies of the metal clusters (three and four transition metals) with  $B_{\beta12}$  monolayer, respectively.  $E_c$  are the cohesive energies of TM bulks, where TM are the metal atoms of the first transition metal series.

| TM- $B_{\beta12}$ | $E_b^{SAC1}$ / eV | $E_b^{CL3}$ / eV | $E_b^{SAC3}$ / eV | $E_b^{CL4}$ / eV | $E_b^{SAC4}$ / eV | $E_c$ / eV |
|-------------------|-------------------|------------------|-------------------|------------------|-------------------|------------|
| <b>Sc</b>         | -6.16             | -4.24            | -5.54             | -4.63            | -5.66             | -4.57      |
| <b>Ti</b>         | -6.07             | -5.30            | -6.59             | -5.46            | -7.00             | -5.56      |
| <b>V</b>          | -4.44             | -4.70            | -5.66             | -4.70            | -6.03             | -5.51      |
| <b>Cr</b>         | -2.95             | -3.30            | -4.07             | -3.23            | -4.45             | -4.37      |
| <b>Mn</b>         | -3.41             | -3.62            | -4.12             | -3.35            | -4.36             | -4.23      |
| <b>Fe</b>         | -4.71             | -4.71            | -5.47             | -4.78            | -5.55             | -5.33      |
| <b>Co</b>         | -4.97             | -5.09            | -5.83             | -4.77            | -5.93             | -5.59      |
| <b>Ni</b>         | -4.42             | -4.93            | -5.47             | -4.61            | -5.66             | -5.02      |
| <b>Cu</b>         | -3.08             | -2.81            | -2.93             | -2.93            | -3.00             | -3.76      |
| <b>Zn</b>         | -1.17             | -0.89            | -0.82             | -0.89            | 0.28              | -1.54      |

<sup>1</sup> $E_b$  are the binding energies of metal atoms with the  $B_{\beta12}$  monolayer, which is calculated by:  $E_b = (E_{TMn-B_{\beta12}} - nE_{TM} - E_{B_{\beta12}}) / n$ , where the  $E_{TMn-B_{\beta12}}$ ,  $E_{TM}$  and  $E_{B_{\beta12}}$  are the energies of  $TM_n-B_{\beta12}$ , metal atoms and  $B_{\beta12}$  monolayer, and n is the number of metal atoms.

<sup>2</sup> $E_c$  are the cohesive energies of transition metals, which is calculated by  $E_c = (E_{TM(bulk)} - nE_{TM}) / n$ , where the  $E_{TM(bulk)}$  is the energy of metal crystal,  $E_{TM}$  is the energy of single metal atom and n is the number of metal atoms in the crystal.

**Table S2.** The Gibbs free energy change of the first protonation step in the CO<sub>2</sub> reduction reaction(CRR) and H<sub>2</sub> evolution reaction (HER) on the TM-B<sub>β12</sub>.

| <b>TM-B<sub>β12</sub></b> | <b>ΔG<sub>H</sub>/ eV</b> | <b>ΔG<sub>C*OOH</sub>/ eV</b> | <b>ΔG<sub>O*CHO</sub>/ eV</b> |
|---------------------------|---------------------------|-------------------------------|-------------------------------|
| <b>Sc</b>                 | 0.725                     | -0.155                        | -1.046                        |
| <b>Ti</b>                 | 0.515                     | -0.472                        | -1.279                        |
| <b>V</b>                  | 0.185                     | -0.800                        | -1.507                        |
| <b>Cr</b>                 | -0.026                    | -0.769                        | -1.266                        |
| <b>Mn</b>                 | -0.168                    | -0.557                        | -0.828                        |
| <b>Fe</b>                 | -0.130                    | -0.510                        | -0.406                        |
| <b>Co</b>                 | 0.035                     | -0.378                        | -0.250                        |
| <b>Ni</b>                 | 0.450                     | -0.308                        | -0.439                        |
| <b>Cu</b>                 | 0.709                     | 0.246                         | -0.304                        |
| <b>Zn</b>                 | -0.101                    | -0.202                        | -0.665                        |

**Table S3.** Adsorption Energy ( $E_{\text{ads}}$ ) of different CO<sub>2</sub> reduction products and the bond length between metal atom and the carbon or oxygen atom ( $R_{\text{TM-C/TM-O}}$ ).

|    | TM-B <sub>β12</sub>               | CO     | HCOOH  | HCHO   | CH <sub>3</sub> OH | CH <sub>4</sub> |
|----|-----------------------------------|--------|--------|--------|--------------------|-----------------|
| Sc | $R_{\text{Sc-C/Sc-O}} / \text{Å}$ | 2.455  | 2.146  | 2.110  | 2.161              | 3.975           |
|    | $E_{\text{ads}} / \text{eV}$      | -0.403 | -1.024 | -0.968 | -1.247             | 0.015           |
| Ti | $R_{\text{Ti-C/Ti-O}} / \text{Å}$ | 2.126  | 2.064  | 2.043  | 2.069              | 2.352           |
|    | $E_{\text{ads}} / \text{eV}$      | -1.085 | -1.243 | -1.137 | -1.391             | -0.414          |
| V  | $R_{\text{V-C/V-O}} / \text{Å}$   | 1.994  | 2.002  | 1.939  | 2.009              | 2.388           |
|    | $E_{\text{ads}} / \text{eV}$      | -1.421 | -1.347 | -1.342 | -1.502             | -0.508          |
| Cr | $R_{\text{Cr-C/Cr-O}} / \text{Å}$ | 1.909  | 2.004  | 1.936  | 1.998              | 2.371           |
|    | $E_{\text{ads}} / \text{eV}$      | -1.952 | -1.277 | -1.305 | -1.360             | -0.486          |
| Mn | $R_{\text{Mn-C/Mn-O}} / \text{Å}$ | 1.821  | 2.006  | 1.945  | 2.000              | 2.375           |
|    | $E_{\text{ads}} / \text{eV}$      | -2.244 | -1.105 | -1.187 | -1.159             | -0.522          |
| Fe | $R_{\text{Fe-C/Fe-O}} / \text{Å}$ | 1.711  | 2.026  | 1.951  | 2.052              | 2.478           |
|    | $E_{\text{ads}} / \text{eV}$      | -2.172 | -0.876 | -0.937 | -1.002             | -0.364          |
| Co | $R_{\text{Co-C/Co-O}} / \text{Å}$ | 1.748  | 2.043  | 1.977  | 2.065              | 3.602           |
|    | $E_{\text{ads}} / \text{eV}$      | -2.002 | -0.784 | -0.729 | -0.811             | -0.392          |
| Ni | $R_{\text{Ni-C/Ni-O}} / \text{Å}$ | 1.759  | 1.959  | 1.895  | 1.978              | 2.993           |
|    | $E_{\text{ads}} / \text{eV}$      | -1.822 | -0.863 | -0.929 | -0.975             | -0.119          |
| Cu | $R_{\text{Cu-C/Cu-O}} / \text{Å}$ | 1.847  | 2.026  | 2.005  | 2.038              | 2.327           |
|    | $E_{\text{ads}} / \text{eV}$      | -1.393 | -0.871 | -0.828 | -1.012             | -0.379          |
| Zn | $R_{\text{Zn-C/Zn-O}} / \text{Å}$ | 1.996  | 2.023  | 2.022  | 2.019              | 2.413           |
|    | $E_{\text{ads}} / \text{eV}$      | -0.919 | -1.011 | -0.914 | -1.204             | -0.288          |
